# Supplementary material for: Nonvolatile reconfigurable sequential logic in a HfO2 resistive random access memory array
Source: Royal Society of Chemistry journal article supplement (doi:10.1039/c7nr00934h), 2017-01-01
Supplement: c7nr00934h1.pdf [file c7nr00934h1.pdf]

Supplementary Information to “Nonvolatile reconfigurable sequential logic in HfO<sub>2</sub>  
resistive random access memory array”

Ya-Xiong Zhou,<sup>a,b†</sup> Yi Li,<sup>a,b,c†</sup> Yu-Ting Su,<sup>c</sup> Zhuo-Rui Wang,<sup>a,b</sup> Ling-Yi Shih,<sup>c</sup> Ting-Chang  
Chang,<sup>c\*</sup> Kuan-Chang Chang,<sup>d</sup> Shi-Bing Long,<sup>e</sup> Simon M. Sze,<sup>f</sup> Xiang-Shui Miao<sup>a,b\*</sup>

<sup>a</sup> *Wuhan National Laboratory for Optoelectronics (WNLO), Huazhong University of Science and  
Technology (HUST), Wuhan 430074, China.*

<sup>b</sup> *School of Optical and Electronic Information, Huazhong University of Science and Technology,  
Wuhan 430074, China.*

<sup>c</sup> *Department of Physics, National Sun Yat-Sen University, Kaohsiung 804, Taiwan.*

<sup>d</sup> *Department of Materials and Optoelectronic Science, National Sun Yat-Sen University,  
Kaohsiung 804, Taiwan*

<sup>e</sup> *Key Laboratory of Microelectronic Devices & Integrated Technology, Institute of  
Microelectronics, Chinese Academy of Sciences, Beijing 100029, China*

<sup>f</sup> *Department of Electronics Engineering and Institute of Electronics, National Chiao Tung  
University, Hsinchu 300, Taiwan*

† These authors contributed equally for this work.

\*Corresponding authors: [miaoxs@hust.edu.cn](mailto:miaoxs@hust.edu.cn); [tcchang3708@gmail.com](mailto:tcchang3708@gmail.com)

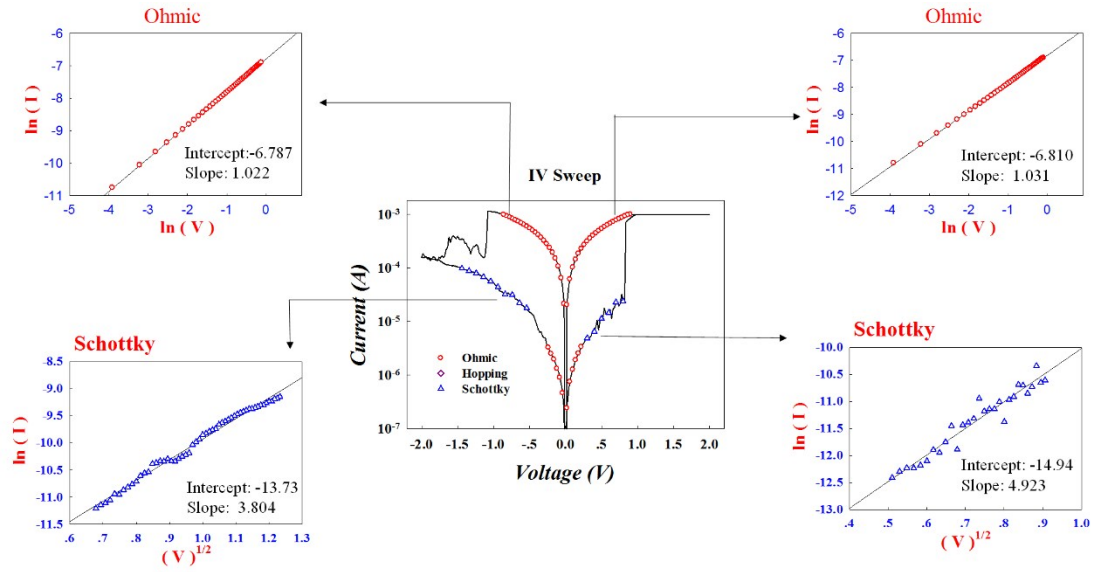

**Fig. S1** Conduction mechanism analysis of the  $\text{HfO}_2$  RRAM through  $I$ - $V$  characteristics fitting. By drawing the curve of  $\ln(V)$ - $\ln(I)$ , the slope of the curves can be obtained as 1.022 and 1.031 in LRS under negative and positive sweeping, respectively, which means the conduction mechanism is dominated by Ohmic mechanism in LRS. By drawing the curve of  $(V)^{1/2}$ - $\ln(I)$ , we can found that the slopes of the curves under negative and positive sweeping in HRS is different (3.804 and 4.923, respectively), which means the conduction mechanism is dominated by Schottky conduction caused by different electrode of the RRAM device in HRS.

|                                                                                                                                                                                                                      |                                                                                                                                                                                                                       |
|----------------------------------------------------------------------------------------------------------------------------------------------------------------------------------------------------------------------|-----------------------------------------------------------------------------------------------------------------------------------------------------------------------------------------------------------------------|
| <p><b>p AND q → M1</b></p> <ul style="list-style-type: none"> <li>MS=0 ( 0X ) A=0 B=1 MS'=0X</li> <li>MS=0 ( 0X ) A=1 B=1 MS'=0X</li> <li>MS=1 ( 1X ) A=0 B=1 MS'=0X</li> <li>MS=1 ( 1X ) A=1 B=1 MS'=1X</li> </ul>  | <p><b>p NAND q → M2</b></p> <ul style="list-style-type: none"> <li>MS=0 ( X1 ) A=0 B=1 MS'=X1</li> <li>MS=0 ( X1 ) A=1 B=1 MS'=X1</li> <li>MS=1 ( X0 ) A=0 B=1 MS'=X1</li> <li>MS=1 ( X0 ) A=1 B=1 MS'=X0</li> </ul>  |
| <p><b>p OR q → M1</b></p> <ul style="list-style-type: none"> <li>MS=0 ( 0X ) A=0 B=0 MS'=0X</li> <li>MS=0 ( 0X ) A=1 B=0 MS'=1X</li> <li>MS=1 ( 1X ) A=0 B=0 MS'=1X</li> <li>MS=1 ( 1X ) A=1 B=0 MS'=1X</li> </ul>   | <p><b>p NOR q → M2</b></p> <ul style="list-style-type: none"> <li>MS=0 ( X1 ) A=0 B=0 MS'=X1</li> <li>MS=0 ( X1 ) A=1 B=0 MS'=X0</li> <li>MS=1 ( X0 ) A=0 B=0 MS'=X0</li> <li>MS=1 ( X0 ) A=1 B=0 MS'=X0</li> </ul>   |
| <p><b>p NIMP q → M1</b></p> <ul style="list-style-type: none"> <li>MS=0 ( 0X ) A=0 B=0 MS'=0X</li> <li>MS=0 ( 0X ) A=0 B=1 MS'=0X</li> <li>MS=1 ( 1X ) A=0 B=0 MS'=1X</li> <li>MS=1 ( 1X ) A=0 B=1 MS'=0X</li> </ul> | <p><b>p IMP q → M2</b></p> <ul style="list-style-type: none"> <li>MS=0 ( X1 ) A=0 B=0 MS'=X1</li> <li>MS=0 ( X1 ) A=0 B=1 MS'=X1</li> <li>MS=1 ( X0 ) A=0 B=0 MS'=X0</li> <li>MS=1 ( X0 ) A=0 B=1 MS'=X1</li> </ul>   |
| <p><b>p RIMP q → M1</b></p> <ul style="list-style-type: none"> <li>MS=0 ( 0X ) A=1 B=0 MS'=1X</li> <li>MS=0 ( 0X ) A=1 B=1 MS'=0X</li> <li>MS=1 ( 1X ) A=1 B=0 MS'=1X</li> <li>MS=1 ( 1X ) A=1 B=1 MS'=1X</li> </ul> | <p><b>p NRIMP q → M2</b></p> <ul style="list-style-type: none"> <li>MS=0 ( X1 ) A=1 B=0 MS'=X0</li> <li>MS=0 ( X1 ) A=1 B=1 MS'=X1</li> <li>MS=1 ( X0 ) A=1 B=0 MS'=X0</li> <li>MS=1 ( X0 ) A=1 B=1 MS'=X0</li> </ul> |

**Fig. S2** Parameter assignments of the 8 different Boolean logic functions. The variables  $p$  and  $q$  are assigned as shown in the blue and red dot blocks, respectively. The logic results are stored as shown in the green dot blocks. i) AND and NAND logic can be achieved by assigning  $p$ ,  $q$  and 1 to S, A and B, respectively. The results are stored in  $M_1$  and  $M_2$ , respectively. ii) OR and NOR logic can be achieved by assigning  $p$ ,  $q$  and 0 to S, A and B, respectively. The results are stored in  $M_1$  and  $M_2$ , respectively. iii) NIMP and IMP logic can be achieved by assigning  $p$ , 0 and  $q$  to S, A and B, respectively. The results are stored in  $M_1$  and  $M_2$ , respectively. iv) NIMP and IMP logic can be achieved by assigning  $p$ , 1 and  $q$  to S, A and B, respectively. The results are stored in  $M_1$  and  $M_2$ , respectively.

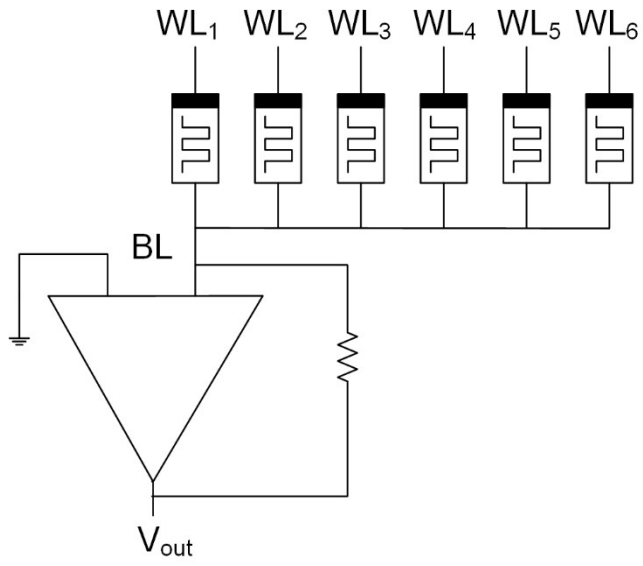

**Fig. S3** The readout of logic result. The logic results stored in the RRAM devices can be acquired by applying a read voltage  $V_{read}$  to the selected unit. Through the operational amplifier, a current signal flowing through the RRAM is converted to a voltage signal, hence the logic results can be read out.

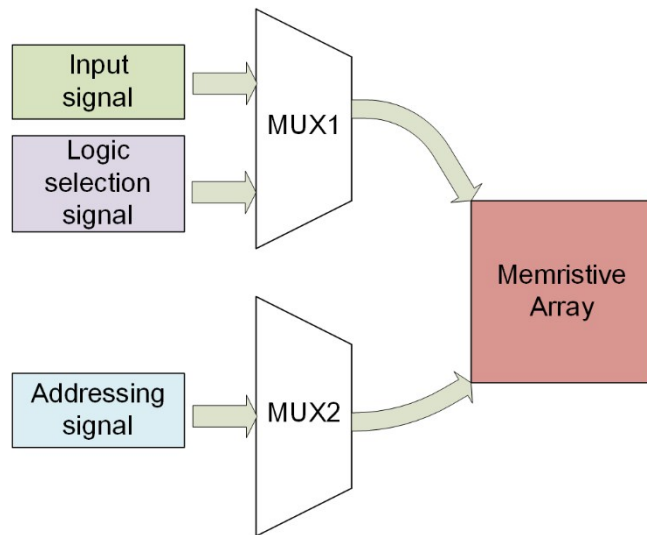

**Fig. S4** Circuit architecture for the RRAM computing architecture. Reconfigurable logic operation can be programmed by this circuit architecture. Through MUX1, the performed logic function can be selected by logic selection signal, then the input signal can be applied to the selected units through MUX2 controlled by the addressing signal.
